# Supplementary material
Source: PubMed Central journal article supplement (PMC2661401)

Supplemental Figure 1: **Sequence alignment of the selected cyanobacterial NfuA, NifU and NfuB proteins.** Amino acid sequences of NfuA, NfuB and NifU proteins from *Synechococcus* sp. PCC 7002 (7002), *Nostoc punctiforme* PCC 73102 (73102) and *Nodularia spumigena* CYY9414 (9414) were compared.

|       |      |     |                                                                   |     |
|-------|------|-----|-------------------------------------------------------------------|-----|
| 9414  | NifU | 1   | MWDYTDKVLLELFYNPQNQGAIEETGEAGVKVAMGEIGSIACGDALRLHLKVE             | 55  |
| 73102 | NifU | 1   | MWDYTDKVLLELFYDPKNQGEIEETGEAGVKVATGEIGSIACGDALRLHLKVE             | 55  |
| 9414  | NifU | 55  | VESDKILDARFQTFGCTSAIASSSALTEMVKGLTLDEALKVSNKQIADYLGGLPEAKMHCSVMGQ | 119 |
| 73102 | NifU | 55  | VESDKILDARFQTFGCTSAIASSSALTEMVKGLTLDEALKVSNKDIADYLGGLPEAKMHCSVMGQ | 119 |
| 9414  | NifU | 120 | EALEAAIYNRGIPLATHDDDDGALICSCFGISEAKIRRVILENHLTDAEQVTNYVKAGGGCGS   | 184 |
| 73102 | NifU | 120 | EALEAAIYNRGIPLATHDDDDGALICSCFGISESKIRRVILENHLTDAEQVTNYVKAGGGCGS   | 184 |
| 9414  | NfuB | 1   | MTKLEELIQEINRFEAIISQWEESQRCVAVGLKRAIEDLHK                         | 41  |
| 73102 | NfuB | 1   | MTNLEELIQEINRFEAIISEWDESQRCVAVGLKRAIEALHK                         | 41  |
| 7002  | NfuA | 1   | MALALTENVEATLD-ELRPYLKADG                                         | 25  |
| 9414  | NfuA | 1   | MELTTENVETVLD-EMRPYLMSDG                                          | 23  |
| 73102 | NfuA | 1   | ELTIDNVETVLD-EMRPYLMSDG                                           | 22  |
| 9414  | NifU | 185 | CLANIDDIIRDVKEKAAPALNTHSVAVAN---SQQSKPLTNVQRIALIQKVLDEEVRPVLADG   | 249 |
| 73102 | NifU | 185 | CLANIDDIIRSVQQEYASPALNNGVQVATEIVTSKERSLTVQKIALIQKVLDEEVRPVLADG    | 249 |
| 9414  | NfuB | 42  | AALTHLIKSLKQESMSALRQAVDDDDIVYVLLYHELKPPQA--PLIERINTALEEVRPGLKSHD  | 104 |
| 73102 | NfuB | 42  | AALTNLIKNLKQESMPALRHAVADELVYAVLLYHELKPPK--PLAQRIETALEEVRPGLKSHD   | 104 |
| 7002  | NfuA | 26  | GNVELVEIDGPVVK-LRLQGACGSCPSSTMTLRMGIERRLRENIPEIAEVEQVF            | 78  |
| 9414  | NfuA | 24  | GNVELVELDGPVVK-LRLQGACGSCPSSTMTLRMGIERRLKEMIEPIAEIEQVI            | 76  |
| 73102 | NfuA | 23  | GNVELVELDGPVVK-LRLQGACGSCPSSTMTLRMGIERRLKEMIEPIAEIEQVV            | 75  |
| 9414  | NifU | 250 | GDVELYDVEGDKVK-VVLQGACGSCSSSTATLTKIAIEARLQDRVSKNLVVEAVAP          | 311 |
| 73102 | NifU | 240 | GDVELYDVEGDRVK-VVLQGACGSCSSSTATLTKIAIEARLQDRVSKSLVVEAV            | 299 |
| 9414  | NfuB | 105 | GDVEFVAIKPPDTVEVKLIGSCSSCPTSTLTLTQSVQAIKNHCPEITKVVAVNHTSTVN-----  | 165 |
| 73102 | NfuB | 105 | GDVELVAIKSPDTVEVRLIGTCSSCPASTLTLTSLQVQAIKNHCPEITKVVAVNNSPAVNNANS  | 170 |
| 9414  | NfuB | 166 | --SPFTPEDTATWVKLTIDQIPESGILTKGVGKNSLILYRQGENITCYLNACPHLATPLDMGKL  | 226 |
| 73102 | NfuB | 171 | LISPFSSKITCTWMKVATLDEVPEFSVVVQLAGTSLILHRQGVTVKCYRNACTHLGSPLEKGV   | 235 |
| 9414  | NfuB | 227 | DNGILTCKSHGFQYNLETGECLETVADVPLQSYYPVQIKGEKVFVKLPKYSI              | 277 |
| 73102 | NfuB | 236 | ENGIITCPAHGFQYKLETGKCLTVPDVSLQSYYPVKVDDKVFVKLQK                   | 281 |

Supplementary Figure 2: **Gel electrophoretic characterization of NfuA stained with Coomassie blue.** (A) Native gel electrophoresis of apo-NfuA and reconstituted Holo-NfuA under anoxic conditions. (B) SDS-PAGE analysis of apo-NfuA: *lane 1*, crosslinked with EDC and *lane 2*, without EDC crosslinking treatment.

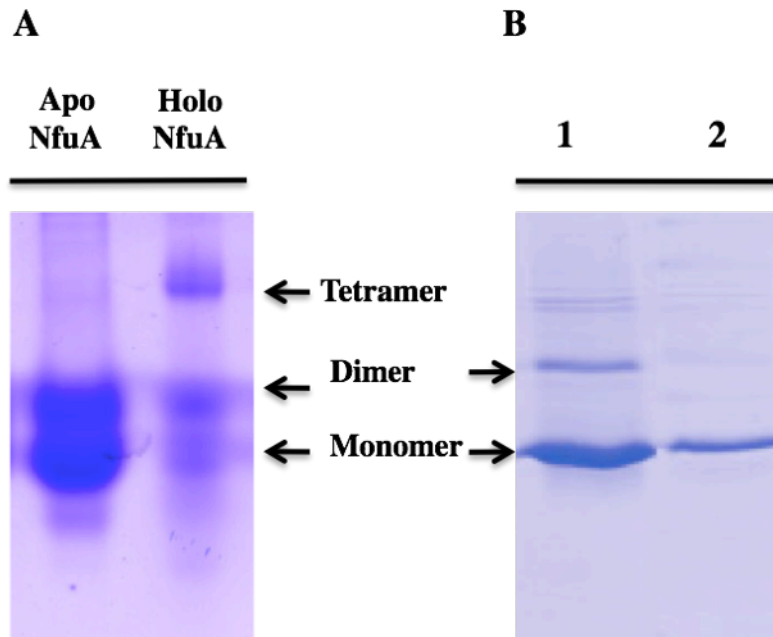

Supplemental Figure 3: **Decay kinetics of the P700<sup>+</sup> flash-induced absorption change at 820 nm.** (A) Sample with 1  $\mu\text{M}$  P700-F<sub>X</sub> core, 20  $\mu\text{M}$  apo-PsaC, 20  $\mu\text{M}$  PsaD, 4  $\mu\text{M}$  DCPIP, 4  $\mu\text{M}$  ascorbate, 0.04% (w/v) DM and 4 mM DTT (negative control). (B) Sample with 1  $\mu\text{M}$  P700-F<sub>X</sub> core, 20  $\mu\text{M}$  holo-PsaC, 20  $\mu\text{M}$  PsaD, 4  $\mu\text{M}$  DCPIP, 4  $\mu\text{M}$  ascorbate, 0.04% (w/v) DM and 4 mM DTT (positive control). (C) Sample with 1  $\mu\text{M}$  P700-F<sub>X</sub> core, 42  $\mu\text{M}$  holo-NfuA, 20  $\mu\text{M}$  apo-PsaC, 20  $\mu\text{M}$  PsaD, 4  $\mu\text{M}$  DCPIP, 4  $\mu\text{M}$  ascorbate, 0.04% (w/v) DM and 4 mM DTT.

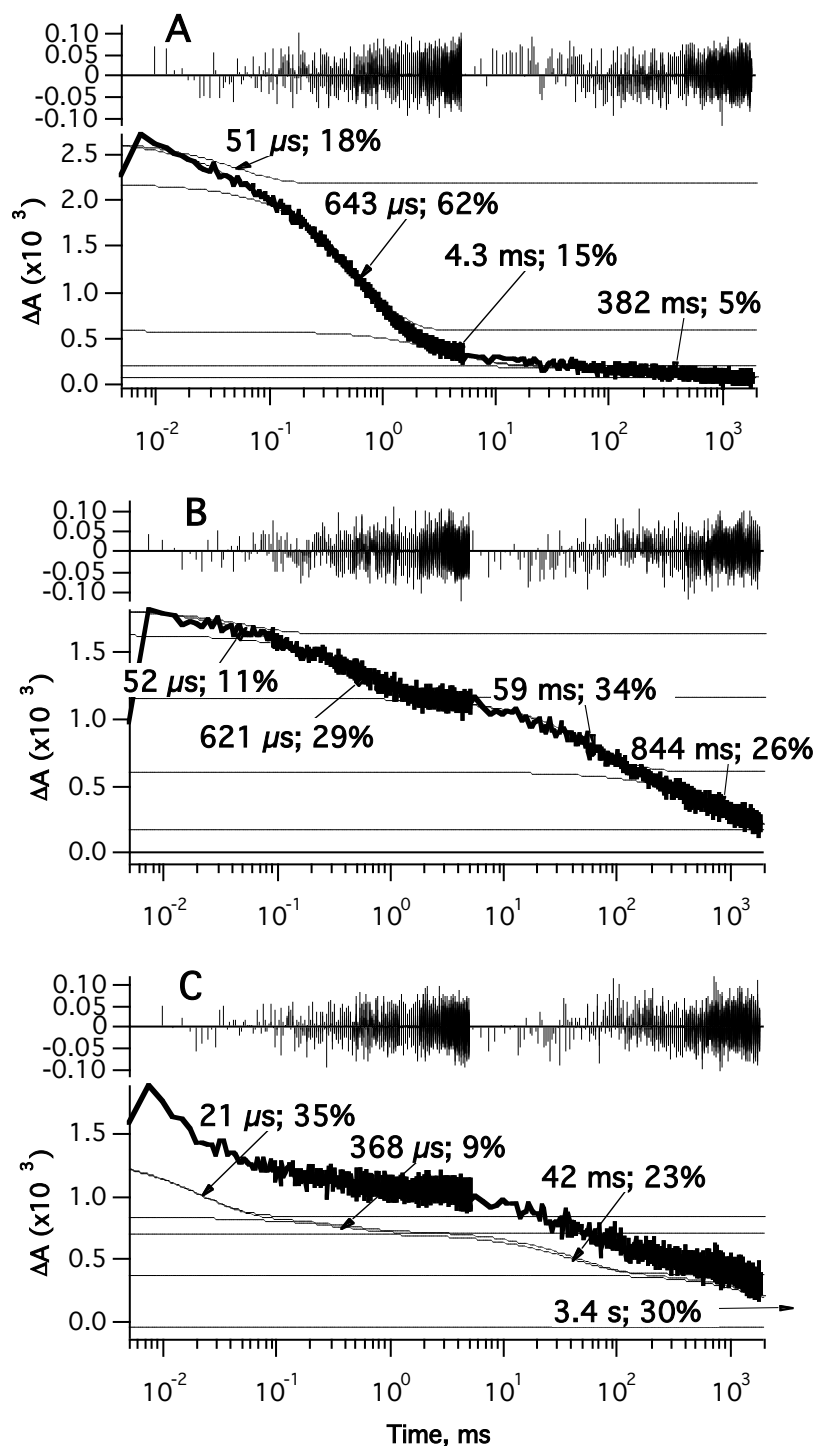

Supplemental Figure 4: **Phylogenetic analysis of NfuA, NifU and NfuB proteins from cyanobacteria.** Amino acid sequences of proteins with similarity to NifU (*i.e.*, NfuA, NifU, and NfuB) were compared from *Synechococcus* sp. PCC 7002 (7002), *Synechococcus elongatus* PCC 7942 (7942), *Synechococcus* sp. PCC 6301 (6301), *Trichodesmium erthraeum* IMS101 (IMS101), *Crocospaera watsonii* WH8501 (8501), *Cyanothece* sp. CCY 0110 (0110), *Synechococcus* sp. BL107 (BL107), *Synechocystis* sp. PCC 6803 (6803), *Anabaena* sp. PCC 7120 (7120), *Nostoc punctiforme* PCC 73102 (73102), *Anabaena variabilis* ATCC 29413 (29413), *Thermosynechococcus elongatus* BP-1 (BP 1), *Gloeobacter violaceus* PCC 7421 (7421), *Synechococcus* sp. WH7803 (7803), *Synechococcus* sp. WH7805 (7805), *Lyngbya* sp. PCC 8106 (8106), *Synechococcus* sp. JA-3-3Ab (JA33Ab), *Synechococcus* sp. JA-2-3Ba (JA23Ba), *Synechococcus* sp. RCC307 (RCC307), *Synechococcus* sp. WH5701 (5701), *Synechococcus* sp. CC9902 (9902), *Synechococcus* sp. WH8102 (8102), *Synechococcus* sp. CC9605 (9605), *Synechococcus* sp. CC9311 (9311), *Nodularia spumigena* CCY9414 (9414), *Synechococcus* sp. RS9916 (9916), *Synechococcus* sp. RS9917 (9917), *Prochlorococcus marinus* CCMP1375 (1375), *Prochlorococcus marinus* CCMP1986 (1986), *Prochlorococcus marinus* MIT9211 (9211), *Prochlorococcus marinus* MIT9301 (9301), *Prochlorococcus marinus* MIT9303 (9303), *Prochlorococcus marinus* MIT9312 (9312), *Prochlorococcus marinus* MIT9313 (9313), *Prochlorococcus marinus* MIT9515 (9515), *Prochlorococcus marinus* AS9601 (9601), *Prochlorococcus* sp. CC9605 (9605), *Prochlorococcus* sp. CC9902 (9902), *Prochlorococcus marinus* NATL2A (NATL2A), and *Azotobacter vinelandii* (Azot). The sequence alignment was generated using the ClustalW module within the MacVector version 10.0.1 (MacVector, Inc., Cary, NC). The neighbor-joining phylogenetic tree was generated using the phylogenetic analysis program PAUP (Sinauer Associates, Sunderland, MA).

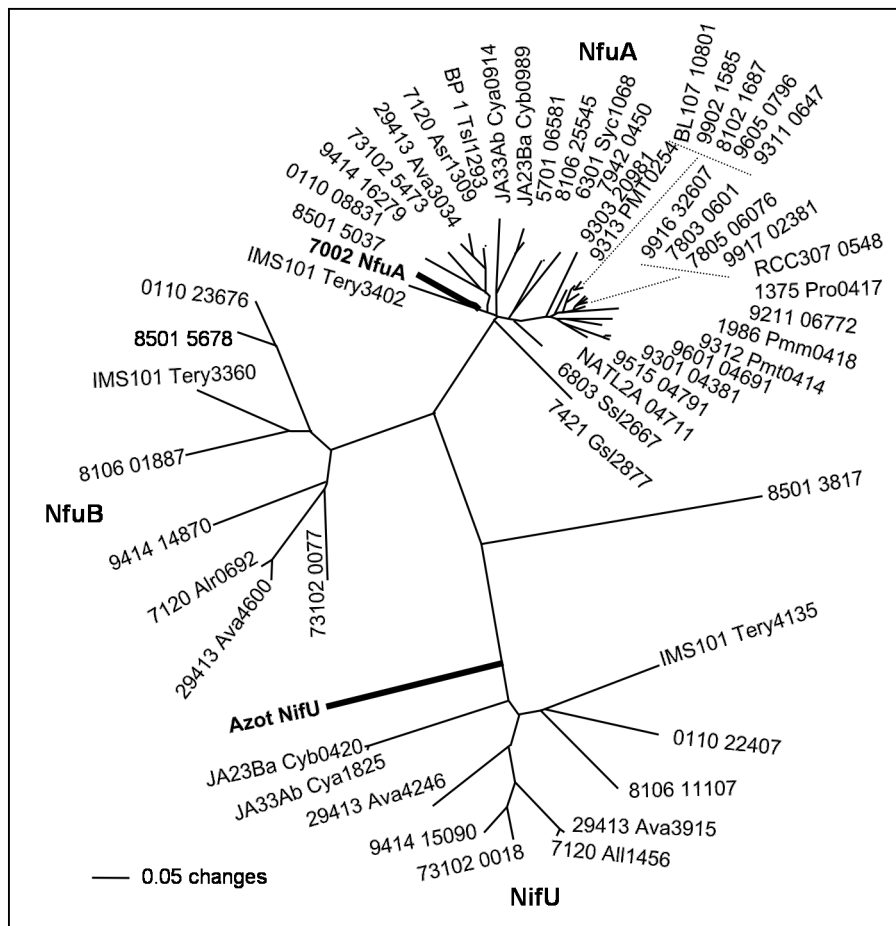

Supplement: M803395200_1.pdf [file M803395200_1.pdf]
